# Supplementary material for: Synthesis, electrochemical characterization and molecular dynamics studies of surface segregation of platinum nano-alloy electrocatalysts
Source: Royal Society of Chemistry journal article supplement (doi:10.1039/c0cp02384a), 2011-01-01
Supplement: c0cp02384a.pdf [file c0cp02384a.pdf]

## Supplementary Information

### Synthesis, Electrochemical Characterization and Molecular Dynamics Studies of Surface Segregation of Platinum Nano-Alloy Electrocatalysts

E. Favry, D. Wang, D. Fantauzzi, J. Anton, D. S. Su, T. Jacob, N. Alonso-Vante

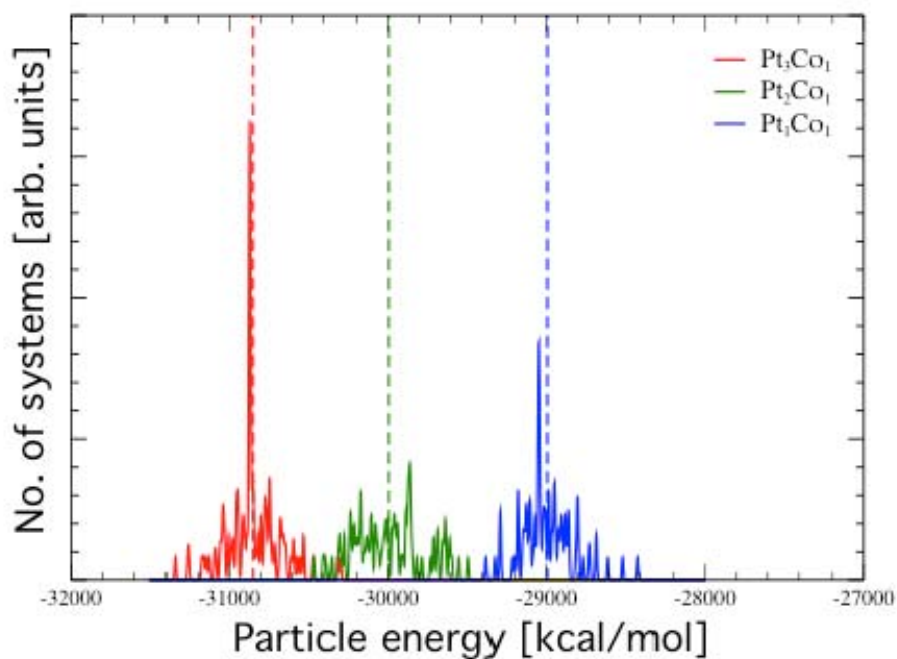

Figure S1: Energy distributions of the 2.0 nm Pt<sub>x</sub>Co<sub>1</sub> ( $x=1,2,3$ ) particles obtained after multiple annealing to 750 K. For each composition the dashed vertical line indicates the average energy.

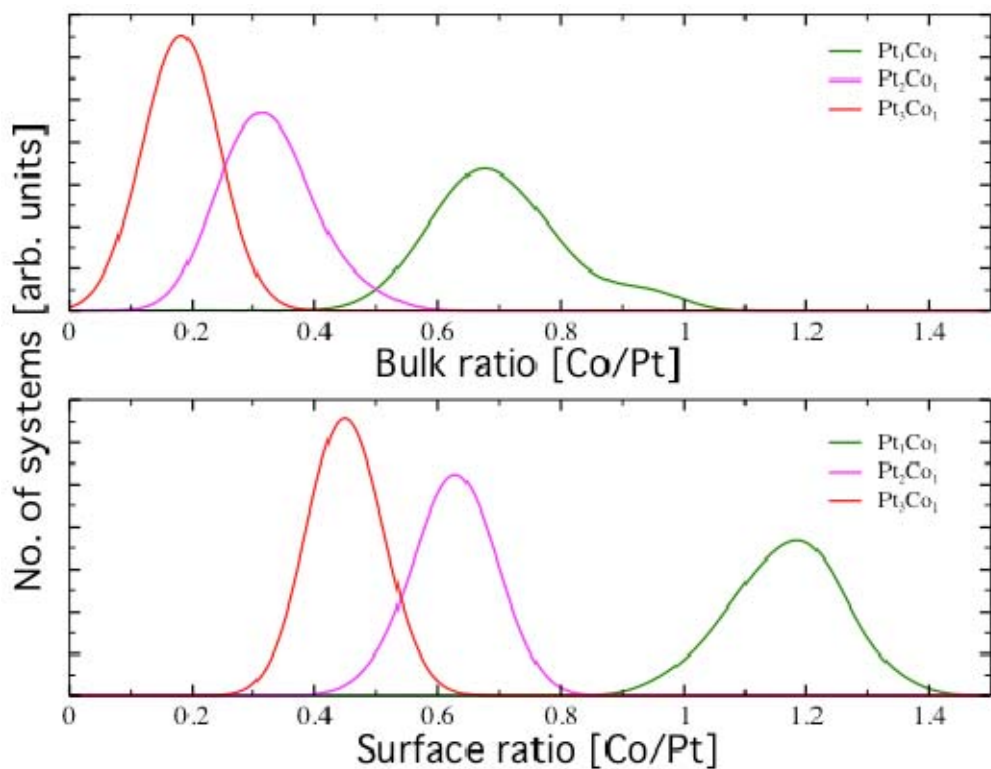

Figure S2: Ratio between Co and Pt in the bulk (top) and at the surface (bottom) for all 2.0 nm  $Pt_xCo_1$  ( $x=1,2,3$ ) particles.

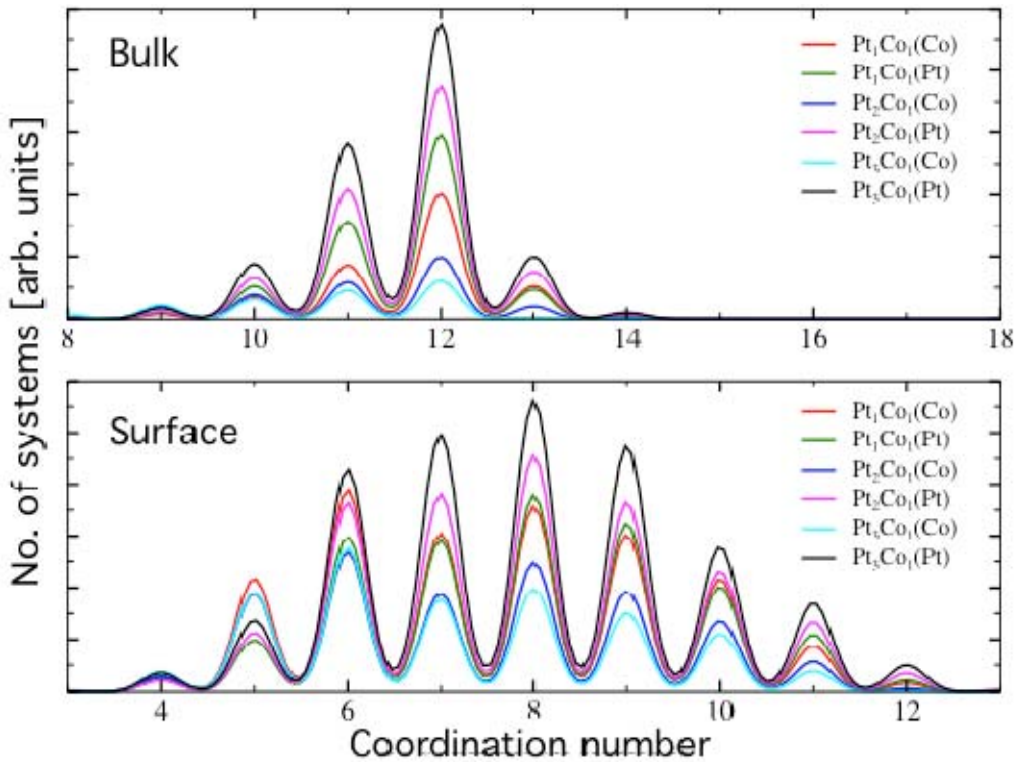

Figure S3: Atomic coordination of bulk (top) and surface (bottom) atoms for the different  $Pt_xCo_1$  nanoparticles averaged over the 100 investigated particles.
